# Supplementary material
Source: PubMed Central journal article supplement (PMC10266547)
Supplement: NIHMS1906863-supplement-Supporting_Info.pdf [file NIHMS1906863-supplement-Supporting_Info.pdf]

## SUPPORTING INFORMATION

### **Simultaneous Detection of Tumor Derived Exosomal Protein-MicroRNA Pairs with an Exo-PROS Biosensor for Cancer Diagnosis**

*Chang-Chieh Hsu<sup>1</sup>, Yunchen Yang<sup>1</sup>, Eric Kannisto<sup>2</sup>, Xie Zeng<sup>3</sup>, Guan Yu<sup>4</sup>, Santosh K. Patnaik<sup>2</sup>, Grace K. Dy<sup>5</sup>, Mary E. Reid<sup>5</sup>, Qiaoqiang Gan<sup>3,6,\*</sup>, Yun Wu<sup>1,\*</sup>*

<sup>1</sup> Department of Biomedical Engineering, University at Buffalo, The State University of New York, Buffalo, NY 14260, United States

<sup>2</sup> Department of Thoracic Surgery, Roswell Park Comprehensive Cancer Center, Elm and Carlton Street, Buffalo, NY 14263, United States

<sup>3</sup> Department of Electrical Engineering, The State University of New York, Buffalo, NY 14260, United States

<sup>4</sup> Department of Biostatistics, University at Buffalo, The State University of New York, Buffalo, NY 14263, United States

<sup>5</sup> Department of Medicine, Roswell Park Comprehensive Cancer Center, Elm and Carlton Street, Buffalo, NY 14263, United States

<sup>6</sup> Materials Science Engineering, King Abdullah University of Science and Technology, Thuwal 23955-6900, Saudi Arabia

#### **\*Corresponding Authors**

Qiaoqiang Gan

Email: qiaoqiang.gan@kaust.edu.sa

Phone: +966 12-808-4410

Yun Wu

Email: ywu32@buffalo.edu

Phone: +1 716-645-8498

Fax: +1 716-645-2207

**Table S1.** Characteristics of normal controls and nonsmall cell lung cancer patients

| <b>No</b> | <b>Histopathological type</b> | <b>Race</b> | <b>Sex</b> | <b>Age</b> | <b>Stage</b>                                          | <b>Exosome size (nm)</b> | <b>Exosome concentration (<math>\times 10^{12}</math> particles/mL)</b> |
|-----------|-------------------------------|-------------|------------|------------|-------------------------------------------------------|--------------------------|-------------------------------------------------------------------------|
| 1         | Normal, low risk              | White       | M          | 70-74      |                                                       | 112                      | 10.64                                                                   |
| 2         | Normal, low risk              | White       | M          | 65-69      |                                                       | 112                      | 4.14                                                                    |
| 3         | Normal, low risk              | White       | M          | 75-79      |                                                       | 107                      | 2.1                                                                     |
| 4         | Normal, low risk              | White       | F          | 55-59      |                                                       | 122                      | 24.51                                                                   |
| 5         | Normal, low risk              | White       | F          | 75-79      |                                                       | 126                      | 21.12                                                                   |
| 6         | Normal, low risk              | White       | F          | 50-54      |                                                       | 124                      | 7.82                                                                    |
| 7         | Normal, low risk              | White       | F          | 75-79      |                                                       | 111                      | 8.08                                                                    |
| 8         | Normal, low risk              | White       | F          | 55-59      |                                                       | 99                       | 13.92                                                                   |
| 9         | Normal, low risk              | White       | M          | 55-59      |                                                       | 102                      | 11.69                                                                   |
| 10        | Normal, low risk              | White       | F          | 60-64      |                                                       | 148                      | 18.03                                                                   |
| 11        | Normal, low risk              | White       | M          | 60-64      |                                                       | 136                      | 25.07                                                                   |
| 12        | Normal, low risk              | White       | F          | 75-79      |                                                       | 121                      | 26.82                                                                   |
| 13        | Normal, low risk              | White       | M          | 55-59      |                                                       | 149                      | 26.28                                                                   |
| 14        | Normal, low risk              | White       | M          | 55-59      |                                                       | 120                      | 19.82                                                                   |
| 15        | Normal, low risk              | White       | F          | 70-74      |                                                       | 108                      | 27.28                                                                   |
| 16        | Normal, high risk             | White       | M          | 65-69      | No pulmonary diseases                                 | 108                      | 32.18                                                                   |
| 17        | Normal, high risk             | White       | M          | 40-44      | Pneumonia; asthma; chronic bronchitis; emphysema/COPD | 131                      | 20.06                                                                   |
| 18        | Normal, high risk             | White       | M          | 70-74      | Chronic bronchitis; emphysema/COPD                    | 150                      | 18.46                                                                   |
| 19        | Normal, high risk             | White       | F          | 45-49      | Pneumonia; Emphysema/COPD                             | 143                      | 13.67                                                                   |
| 20        | Normal, high risk             | White       | M          | 65-69      | Asthma; emphysema/COPD                                | 87                       | 8.37                                                                    |
| 21        | Normal, high risk             | White       | F          | 50-54      | No pulmonary diseases                                 | 139                      | 19.37                                                                   |
| 22        | Normal, high risk             | White       | M          | 50-54      | Chronic bronchitis; emphysema/COPD                    | 146                      | 10.58                                                                   |
| 23        | Normal, high risk             | White       | M          | 55-59      | No pulmonary diseases                                 | 112                      | 20.24                                                                   |
| 24        | Normal, high risk             | White       | F          | 55-59      | No pulmonary diseases                                 | 102                      | 10.73                                                                   |
| 25        | Normal, high risk             | White       | F          | 55-59      | Emphysema/COPD                                        | 139                      | 24                                                                      |

|    |                         |         |   |       |                                            |     |       |
|----|-------------------------|---------|---|-------|--------------------------------------------|-----|-------|
| 26 | Normal, high risk       | White   | M | 50-54 | No pulmonary diseases                      | 154 | 17.4  |
| 27 | Normal, high risk       | White   | M | 60-64 | Chronic bronchitis; emphysema/COPD         | 140 | 21.2  |
| 28 | Normal, high risk       | White   | F | 60-64 | Asthma; chronic bronchitis                 | 136 | 14.66 |
| 29 | Normal, high risk       | Unknown | M | 55-59 | Emphysema/COPD                             | 141 | 9.06  |
| 30 | Normal, high risk       | White   | F | 70-74 | Pneumonia                                  | 155 | 20.14 |
| 31 | Normal, high risk       | White   | M | 65-69 | Emphysema/COPD                             | 164 | 16.9  |
| 32 | Normal, high risk       | White   | M | 50-54 | Emphysema/COPD                             | 162 | 8.44  |
| 33 | Normal, high risk       | White   | F | 50-54 | Asthma; chronic bronchitis; emphysema/COPD | 117 | 18.24 |
| 34 | Normal, high risk       | White   | F | 50-54 | Emphysema/COPD                             | 90  | 10.02 |
| 35 | Normal, high risk       | White   | M | 55-59 | Asthma; chronic bronchitis; emphysema/COPD | 165 | 29.28 |
| 36 | Adenocarcinoma          | White   | M | 70-74 | 1A                                         | 139 | 15.41 |
| 37 | Adenocarcinoma          | White   | M | 70-74 | 1A                                         | 131 | 7.47  |
| 38 | Adenocarcinoma          | White   | F | 70-74 | 1A                                         | 126 | 21.92 |
| 39 | Adenocarcinoma          | White   | F | 70-74 | 1A                                         | 99  | 8.66  |
| 40 | Adenocarcinoma          | White   | F | 50-54 | 1A                                         | 122 | 7.35  |
| 41 | Adenocarcinoma          | White   | F | 55-59 | 2B                                         | 126 | 15.18 |
| 42 | Squamous cell carcinoma | White   | M | 60-64 | 2A                                         | 105 | 33.3  |
| 43 | Adenocarcinoma          | White   | F | 55-59 | 1B                                         | 108 | 27.52 |
| 44 | Squamous cell carcinoma | White   | M | 65-69 | 2A                                         | 111 | 19.33 |
| 45 | Squamous cell carcinoma | White   | M | 75-79 | 2B                                         | 120 | 19.05 |
| 46 | Squamous cell carcinoma | White   | M | 55-59 | 2A                                         | 128 | 30.28 |
| 47 | Adenocarcinoma          | White   | F | 55-59 | 1A                                         | 128 | 24.16 |
| 48 | Adenocarcinoma          | White   | M | 65-69 | 1A                                         | 144 | 22.14 |
| 49 | Adenocarcinoma          | White   | F | 65-69 | 2A                                         | 115 | 19.66 |
| 50 | Adenocarcinoma          | White   | F | 70-74 | 2B                                         | 136 | 26.72 |
| 51 | Adenocarcinoma          | White   | F | 60-64 | 1B                                         | 118 | 29.72 |
| 52 | Squamous cell carcinoma | White   | M | 65-69 | 2A                                         | 146 | 22.09 |
| 53 | Adenocarcinoma          | White   | F | 70-74 | 2B                                         | 124 | 23.59 |
| 54 | Squamous cell carcinoma | White   | M | 55-59 | 1A                                         | 143 | 23.02 |
| 55 | Adenocarcinoma          | White   | F | 65-69 | 1B                                         | 140 | 24.68 |

|    |                         |       |   |       |    |     |       |
|----|-------------------------|-------|---|-------|----|-----|-------|
| 56 | Adenocarcinoma          | White | F | 70-74 | 2B | 97  | 7.32  |
| 57 | Adenocarcinoma          | White | F | 75-79 | 1A | 66  | 2.05  |
| 58 | Adenocarcinoma          | White | F | 55-59 | 1A | 88  | 12.16 |
| 59 | Adenocarcinoma          | White | M | 60-64 | 1A | 102 | 10.24 |
| 60 | Adenocarcinoma          | White | F | 60-64 | 2B | 105 | 12.53 |
| 61 | Adenocarcinoma          | White | M | 55-59 | 2B | 77  | 6.95  |
| 62 | Squamous cell carcinoma | White | M | 75-79 | 1A | 85  | 7.68  |
| 63 | Small cell carcinoma    | White | F | 70-74 | 2B | 86  | 6.19  |
| 64 | Small cell carcinoma    | White | F | 75-79 | 1B | 85  | 18.89 |
| 65 | Small cell carcinoma    | White | F | 70-74 | 1A | 74  | 6.05  |
| 66 | Adenocarcinoma          | White | M | 55-59 | 4  | 109 | 16.04 |
| 67 | Adenocarcinoma          | White | M | 70-74 | 3A | 144 | 13.59 |
| 68 | Adenocarcinoma          | White | M | 75-79 | 3A | 114 | 25.04 |
| 69 | Adenocarcinoma          | White | F | 75-79 | 3B | 107 | 14.42 |
| 70 | Adenocarcinoma          | White | F | 55-59 | 4  | 87  | 6.97  |
| 71 | Adenocarcinoma          | White | M | 65-69 | 3B | 104 | 6.31  |
| 72 | Adenocarcinoma          | White | F | 60-64 | 4  | 111 | 29.84 |
| 73 | Adenocarcinoma          | White | M | 50-54 | 4  | 110 | 10.06 |
| 74 | Adenocarcinoma          | White | F | 75-79 | 4  | 123 | 16.79 |
| 75 | Adenocarcinoma          | White | F | 70-74 | 4  | 134 | 8.28  |
| 76 | Squamous cell carcinoma | White | F | 55-59 | 4  | 109 | 22.31 |
| 77 | Squamous cell carcinoma | White | F | 55-59 | 3B | 122 | 23.85 |
| 78 | Adenocarcinoma          | White | M | 55-59 | 3A | 138 | 22.92 |
| 79 | Squamous cell carcinoma | White | M | 60-64 | 3A | 114 | 7.7   |
| 80 | Squamous cell carcinoma | White | M | 50-54 | 3A | 136 | 19.03 |
| 81 | Adenocarcinoma          | White | M | 50-54 | 4  | 104 | 27.09 |
| 82 | Adenocarcinoma          | White | M | 60-64 | 3B | 113 | 29.34 |
| 83 | Adenocarcinoma          | White | M | 65-69 | 3A | 127 | 25.32 |
| 84 | Squamous cell carcinoma | White | M | 55-59 | 4  | 105 | 19.35 |
| 85 | Adenocarcinoma          | White | F | 55-59 | 3B | 128 | 18.07 |
| 86 | Adenocarcinoma          | White | F | 55-59 | 3B | 66  | 5.60  |
| 87 | Adenocarcinoma          | White | F | 60-64 | 3A | 72  | 4.26  |
| 88 | Adenocarcinoma          | White | F | 55-59 | 3B | 74  | 3.13  |
| 89 | Adenocarcinoma          | White | M | 60-64 | 4A | 109 | 12.88 |

|    |                         |       |   |       |    |    |       |
|----|-------------------------|-------|---|-------|----|----|-------|
| 90 | Squamous cell carcinoma | White | F | 70-74 | 4B | 88 | 1.96  |
| 91 | Small cell carcinoma    | White | M | 60-64 | 4B | 69 | 4.80  |
| 92 | Small cell carcinoma    | White | M | 60-64 | 4  | 70 | 10.93 |
| 93 | Small cell carcinoma    | White | F | 70-74 | 4A | 81 | 8.85  |
| 94 | Small cell carcinoma    | White | F | 65-69 | 4B | 74 | 8.21  |
| 95 | Small cell carcinoma    | White | M | 55-59 | 4B | 64 | 5.53  |

**Table S2.** Characteristics of normal controls and breast cancer patients

| No | Histopathological type                    | Race  | Sex | Age   | Stage | ER       | PR       | HER2 |
|----|-------------------------------------------|-------|-----|-------|-------|----------|----------|------|
| 1  | Normal                                    | Black | F   | 40-44 |       |          |          |      |
| 2  | Normal                                    | White | F   | 35-39 |       |          |          |      |
| 3  | Normal                                    | White | F   | 40-44 |       |          |          |      |
| 4  | Normal                                    | White | F   | 45-49 |       |          |          |      |
| 5  | Normal                                    | White | F   | 55-59 |       |          |          |      |
| 6  | Normal                                    | White | F   | 55-59 |       |          |          |      |
| 7  | Normal                                    | White | F   | 65-69 |       |          |          |      |
| 8  | Normal                                    | White | F   | 65-69 |       |          |          |      |
| 9  | Normal                                    | White | F   | 70-74 |       |          |          |      |
| 10 | Normal                                    | White | F   | 75-79 |       |          |          |      |
| 11 | Normal                                    | White | F   | 70-74 |       |          |          |      |
| 12 | Normal                                    | White | F   | 50-54 |       |          |          |      |
| 13 | Normal                                    | White | F   | 50-54 |       |          |          |      |
| 14 | Normal                                    | White | F   | 60-64 |       |          |          |      |
| 15 | Normal                                    | White | F   | 60-64 |       |          |          |      |
| 16 | Normal                                    | White | F   | 75-79 |       |          |          |      |
| 17 | Normal                                    | White | F   | 60-64 |       |          |          |      |
| 18 | Normal                                    | White | F   | 45-49 |       |          |          |      |
| 19 | Normal                                    | Asian | F   | 65-69 |       |          |          |      |
| 20 | Normal                                    | White | F   | 75-79 |       |          |          |      |
| 21 | Ductal carcinoma in situ                  | White | F   | 60-64 | 0     | Positive | Positive | NA   |
| 22 | Ductal carcinoma in situ                  | White | F   | 55-59 | 0     | Positive | Negative | NA   |
| 23 | Ductal carcinoma in situ                  | White | F   | 65-69 | 0     | Positive | Positive | NA   |
| 24 | Ductal carcinoma in situ                  | White | F   | 30-34 | 0     | Negative | Negative | NA   |
| 25 | Ductal carcinoma in situ                  | White | F   | 70-74 | 0     | Negative | Negative | NA   |
| 26 | Ductal carcinoma in situ                  | Asian | F   | 60-64 | 0     | Positive | Positive | NA   |
| 27 | Ductal carcinoma in situ                  | White | F   | 40-44 | 0     | Positive | Positive | NA   |
| 28 | Ductal carcinoma in situ                  | White | F   | 60-64 | 0     | Negative | Negative | NA   |
| 29 | Ductal carcinoma in situ                  | White | F   | 75-79 | 0     | Positive | Positive | NA   |
| 30 | Intraductal carcinoma,<br>noninfiltrating | White | F   | 45-49 | 0     | Positive | Positive | NA   |
| 31 | Intraductal carcinoma,<br>noninfiltrating | White | F   | 55-59 | 0     | Positive | Positive | NA   |
| 32 | Intraductal carcinoma,<br>noninfiltrating | White | F   | 40-44 | 0     | Positive | Positive | NA   |
| 33 | Intraductal carcinoma,<br>noninfiltrating | Black | F   | 75-59 | 0     | Positive | Positive | NA   |
| 34 | Ductal carcinoma in situ                  | White | F   | 70-74 | 0     | Positive | Positive | NA   |

|    |                                         |       |   |       |   |          |          |            |
|----|-----------------------------------------|-------|---|-------|---|----------|----------|------------|
| 35 | Intraductal carcinoma, noninfiltrating  | White | F | 55-59 | 0 | Positive | Positive | NA         |
| 36 | Infiltrating duct carcinoma             | White | F | 45-49 | 1 | Positive | Positive | Borderline |
| 37 | Infiltrating duct carcinoma             | White | F | 55-59 | 1 | Negative | Positive | Negative   |
| 38 | Infiltrating duct carcinoma             | White | F | 55-59 | 1 | Negative | Negative | Positive   |
| 39 | Infiltrating duct carcinoma             | White | F | 65-69 | 1 | Positive | Positive | Negative   |
| 40 | Infiltrating duct carcinoma             | White | F | 65-69 | 1 | Positive | Positive | Negative   |
| 41 | Infiltrating duct carcinoma             | White | F | 75-79 | 1 | Negative | Negative | Negative   |
| 42 | Infiltrating duct carcinoma             | White | F | 65-69 | 1 | Negative | Negative | Negative   |
| 43 | Infiltrating duct carcinoma             | White | F | 35-39 | 2 | Negative | Negative | Positive   |
| 44 | Infiltrating duct carcinoma             | White | F | 65-69 | 2 | Negative | Negative | Negative   |
| 45 | Infiltrating duct carcinoma             | Black | F | 40-44 | 2 | Negative | Positive | Negative   |
| 46 | Infiltrating duct carcinoma             | White | F | 35-39 | 2 | Positive | Positive | Negative   |
| 47 | Infiltrating duct carcinoma             | White | F | 40-44 | 2 | Positive | Positive | Negative   |
| 48 | Infiltrating duct carcinoma             | White | F | 70-74 | 2 | Positive | Positive | Negative   |
| 49 | Infiltrating duct carcinoma             | White | F | 30-34 | 2 | Negative | Negative | Negative   |
| 50 | Infiltrating duct carcinoma             | White | F | 55-59 | 2 | Negative | Negative | Positive   |
| 51 | Infiltrating duct carcinoma             | White | F | 75-79 | 3 | Positive | Positive | Negative   |
| 52 | Infiltrating duct carcinoma             | White | F | 45-49 | 3 | Positive | Positive | Negative   |
| 53 | Infiltrating duct carcinoma             | White | F | 45-49 | 3 | Positive | Positive | Negative   |
| 54 | Infiltrating duct carcinoma             | White | F | 60-64 | 3 | Negative | Negative | Positive   |
| 55 | Infiltrating duct carcinoma             | Black | F | 45-49 | 3 | Negative | Negative | Positive   |
| 56 | Infiltrating duct carcinoma             | White | F | 60-64 | 3 | Negative | Negative | Negative   |
| 57 | Infiltrating duct carcinoma             | White | F | 55-59 | 3 | Positive | Positive | Negative   |
| 58 | Infiltrating duct carcinoma             | Asian | F | 35-39 | 3 | Positive | Positive | Negative   |
| 59 | Infiltrating duct carcinoma             | White | F | 55-59 | 3 | Negative | Negative | Negative   |
| 60 | Infiltrating duct and lobular carcinoma | White | F | 50-54 | 3 | Positive | Negative | Positive   |
| 61 | Infiltrating duct carcinoma             | Black | F | 75-79 | 3 | Positive | Negative | Positive   |
| 62 | Infiltrating duct and lobular carcinoma | Black | F | 55-59 | 3 | Negative | Negative | Negative   |
| 63 | Infiltrating duct carcinoma             | White | F | 65-69 | 3 | Positive | Negative | Negative   |
| 64 | Infiltrating duct carcinoma             | White | F | 55-59 | 3 | Negative | Negative | Negative   |
| 65 | Invasive carcinoma of no special type   | White | F | 60-64 | 3 | Negative | Negative | Negative   |
| 66 | Infiltrating duct carcinoma             | White | F | 50-54 | 4 | Negative | Negative | Positive   |
| 67 | Infiltrating duct carcinoma             | White | F | 70-74 | 4 | Positive | Positive | Negative   |
| 68 | Infiltrating duct carcinoma             | Black | F | 40-44 | 4 | Positive | Positive | Negative   |
| 69 | Infiltrating duct carcinoma             | White | F | 35-39 | 4 | Positive | Positive | Negative   |
| 70 | Infiltrating duct carcinoma             | White | F | 40-44 | 4 | Positive | Positive | Positive   |
| 71 | Infiltrating duct carcinoma             | White | F | 45-49 | 4 | Positive | Positive | Negative   |
| 72 | Infiltrating duct carcinoma             | White | F | 55-59 | 4 | Negative | Negative | Negative   |

|    |                             |       |   |       |   |          |          |          |
|----|-----------------------------|-------|---|-------|---|----------|----------|----------|
| 73 | Infiltrating duct carcinoma | White | F | 55-59 | 4 | Positive | Positive | Negative |
| 74 | Infiltrating duct carcinoma | White | F | 65-69 | 4 | Positive | Positive | Negative |
| 75 | Infiltrating duct carcinoma | White | F | 65-69 | 4 | Positive | Positive | Negative |
| 76 | Infiltrating duct carcinoma | White | F | 75-79 | 4 | Negative | Positive | Negative |
| 77 | Infiltrating duct carcinoma | Black | F | 70-74 | 4 | Negative | Negative | Positive |
| 78 | Infiltrating duct carcinoma | White | F | 70-74 | 4 | Negative | Negative | Negative |
| 79 | Infiltrating duct carcinoma | White | F | 55-59 | 4 | Negative | Negative | Positive |
| 80 | Infiltrating duct carcinoma | White | F | 50-54 | 4 | Positive | Positive | Negative |



**a** Size distribution of A549 cell-derived exosomes

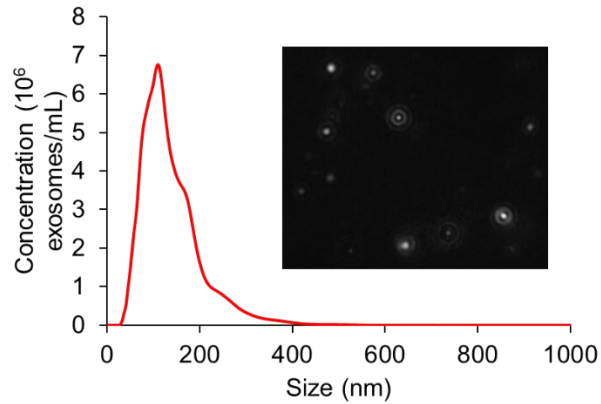

**b** Exosome markers characterized by Exo-Check Exosome Antibody Arrays

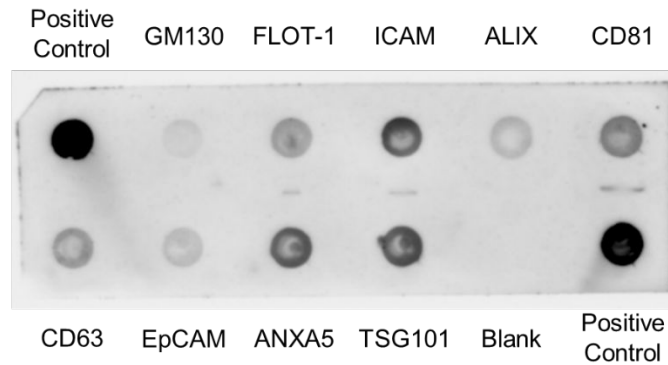

**c** Exosome markers characterized by western blotting

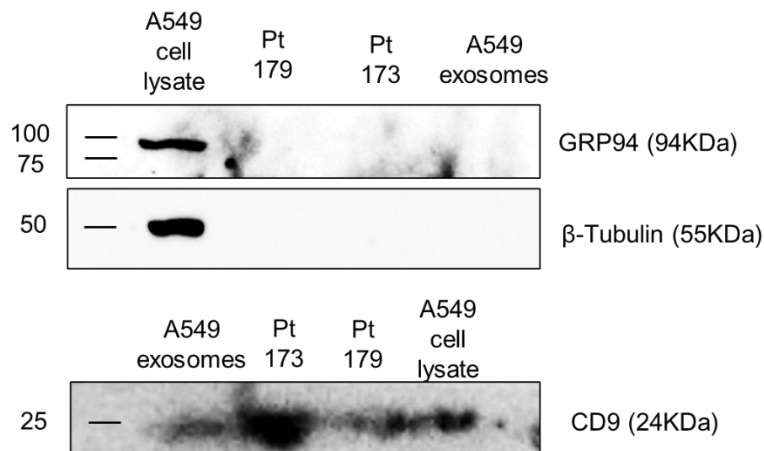

**Figure S1. Characterization of exosomes.** (a) Representative size distribution of exosomes from A549 NSCLC cells. (b) Exosome markers characterized by Exo-Check Exosome Antibody Arrays. Exosomes were isolated from the serum sample of a late stage nonsmall cell lung cancer

(NSCLC) patient (patient ID: 129). Strong expression of exosome positive markers such as FLOT-1, ICAM, CD81 and TSG101, and little expression of exosome negative marker GM130 (cis-Golgi marker) demonstrated the high purity and minimal cellular contamination of isolated exosomes. (c) Exosome markers characterized by western blotting. Exosomes were isolated from serum samples from 2 NSCLC patients (patient IDs: 173 and 179) and cell culture medium of A549 NSCLC cells. A549 cell lysate was used as the positive control. No expression of negative markers including GRP94 and  $\beta$ -tubulin was detected in exosomes but in A549 cell lysate. Strong expression of positive marker, CD9 was detected in all samples. The results demonstrated high purity of exosomes. Western blotting conditions: 20  $\mu$ g protein per sample was loaded. Primary antibodies against GRP94 (Santa Cruz Biotechnology, sc-393402, clone H-10),  $\beta$ -tubulin (Sigma, T8328, clone AA2) and CD9 (System Bioscience, EXOAB-CD9A-1) were added at 1:500, 1:1000 and 1:1000 respectively. Secondary antibodies (Santa Cruz Biotechnology, sc-516102) were added at 1:2000 for GRP94 and CD9 and 1:5000 for  $\beta$ -tubulin.

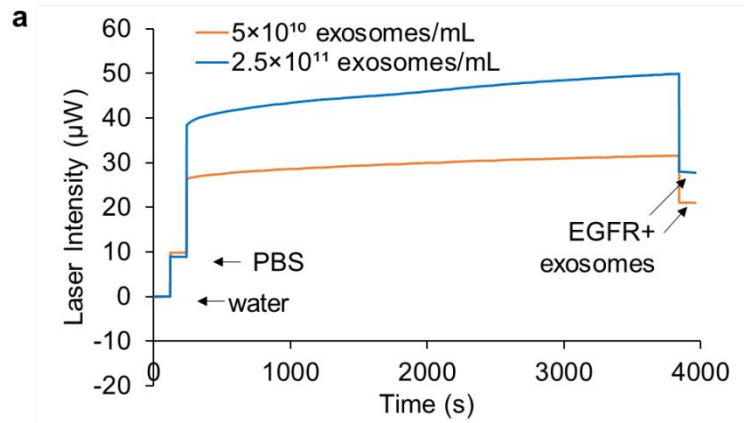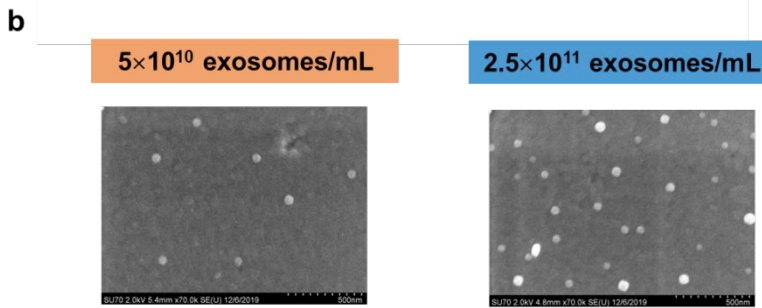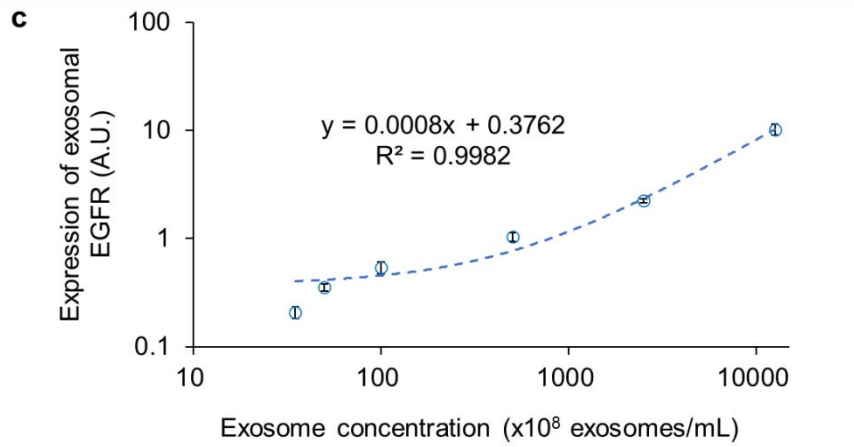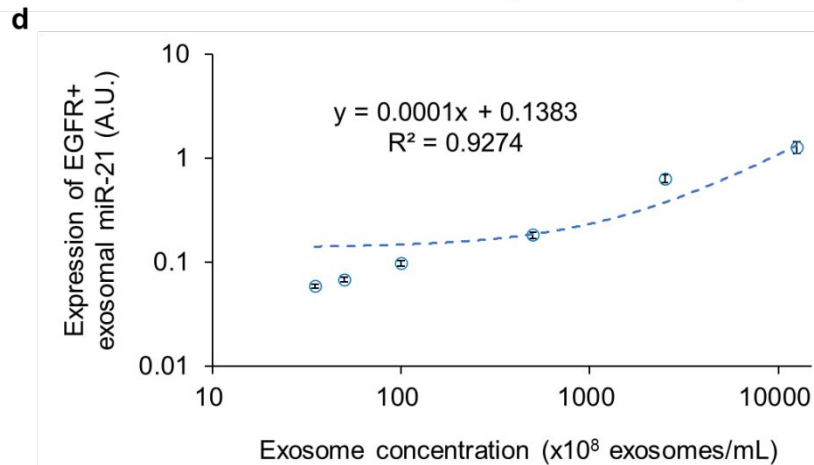

**Figure S2. Limit of detection and linear range of Exo-PROS assay in detecting exosomal EGFR-miR-21 pair.** The expression of EGFR and miR-21 in A549 cell-derived exosomes at concentrations of 0 (blank control) to  $1.25 \times 10^{12}$  exosomes/mL were measured by Exo-PROS assay. (a) Representative SPR curves that measured the levels of EGFR in A549 cell-derived exosomes at concentrations of  $5 \times 10^{10}$  and  $2.5 \times 10^{11}$  exosomes/mL. (b) SEM images of EGFR+ exosomes captured on the biochip surface. Approximately 5-fold more exosomes were captured on the biochip when exosomes were applied at 5-fold higher concentration. (c, d) The LODs for EGFR and EGFR+ exosomal miR-21 were  $3.5 \times 10^9$  exosomes/mL and  $5 \times 10^9$  exosomes/mL, respectively. Exo-PROS assay showed about 3-log linear range in detecting exosomal EGFR-miR-21 pair.

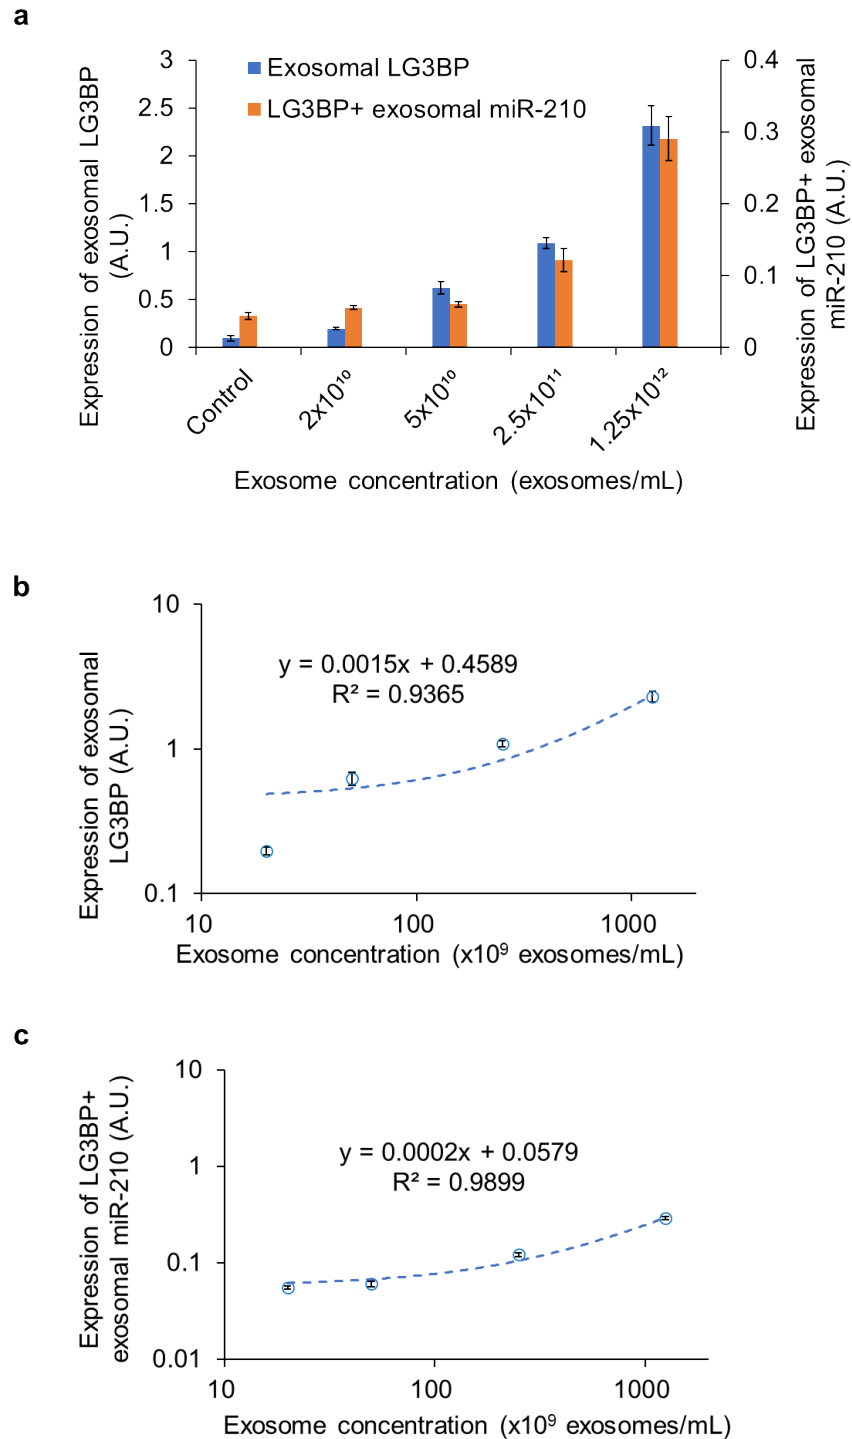

**Figure S3. Limit of detection and linear range of Exo-PROS assay in detecting exosomal LG3BP-miR-210 pair.** The expression of LG3BP (a, b) and miR-210 (a, c) in A549 cell-derived exosomes at concentrations of 0 (blank control) to  $1.25 \times 10^{12}$  exosomes/mL were measured by Exo-PROS assay. The LODs for LG3BP and LG3BP+ exosomal miR-210 were  $2 \times 10^{10}$  and  $5 \times 10^{10}$  exosomes/mL, respectively. Exo-PROS assay showed 2-log linear range in detecting exosomal LG3BP-miR-210 pair.

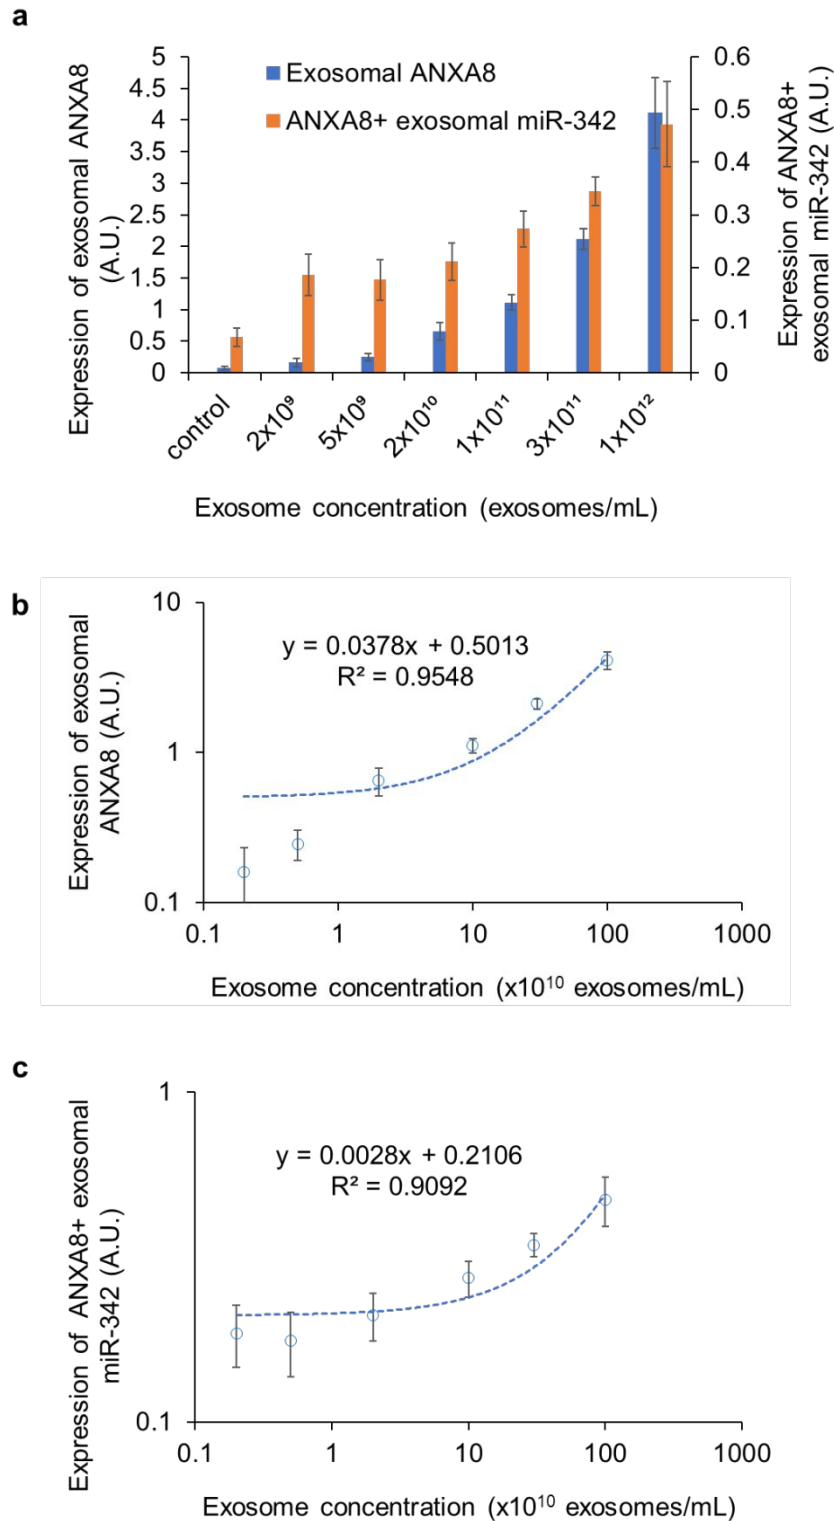

**Figure S4. Limit of detection and linear range of Exo-PROS assay in detecting exosomal ANXA8-miR-342 pair.** The expression of ANXA8 (a, b) and miR-342 (a, c) in MDA-MB-231 cell-derived exosomes at concentrations of 0 (blank control) to  $10^{12}$  exosomes/mL were measured by Exo-PROS assay. The LODs for ANXA8 and ANXA8+ exosomal miR-342 were

$5 \times 10^9$  and  $2 \times 10^{10}$  exosomes/mL, respectively. Exo-PROS assay showed 2-log linear range in detecting exosomal ANXA8-miR-342 pair.

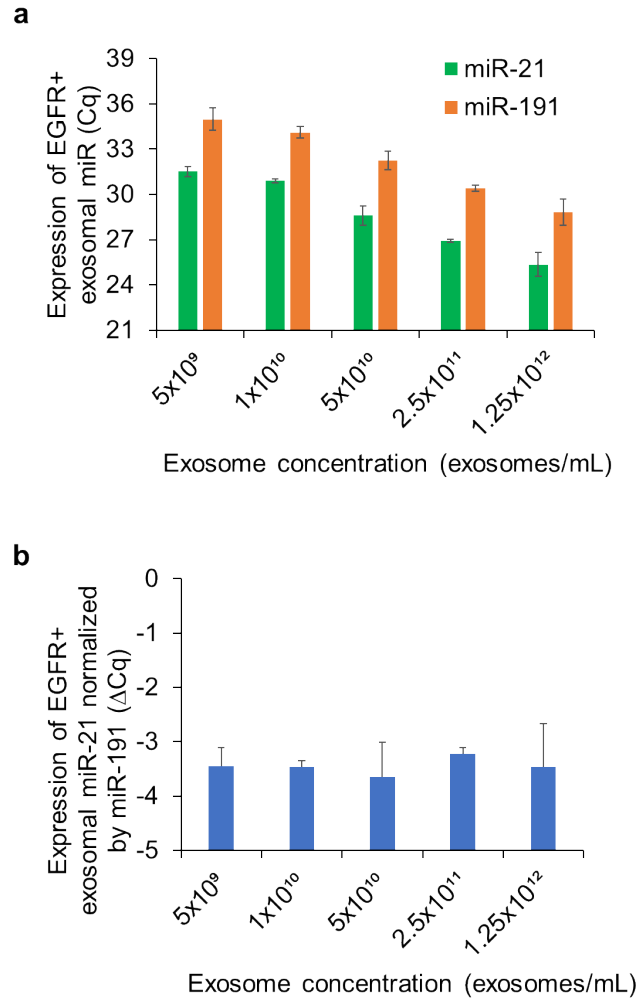

**Figure S5. Characterization of EGFR+ exosomal miR-21 using IMS-PCR workflow.** A549 cell-derived exosomes were prepared at concentrations of  $5 \times 10^9$  to  $1.25 \times 10^{12}$  exosomes/mL. (a) IMS-PCR workflow was used to measure the expression of EGFR+ exosomal miR-21 and miR-191 (endogenous control). The levels of miR-21 and miR-191 increased with the increase of exosome concentration. (b) The expression of EGFR+ exosomal miR-21 was normalized by miR-191.  $\Delta Cq = Cq_{miR-21} - Cq_{miR-191}$ . No significant difference between samples was seen, demonstrating that the measurements of miRNAs were accurate.



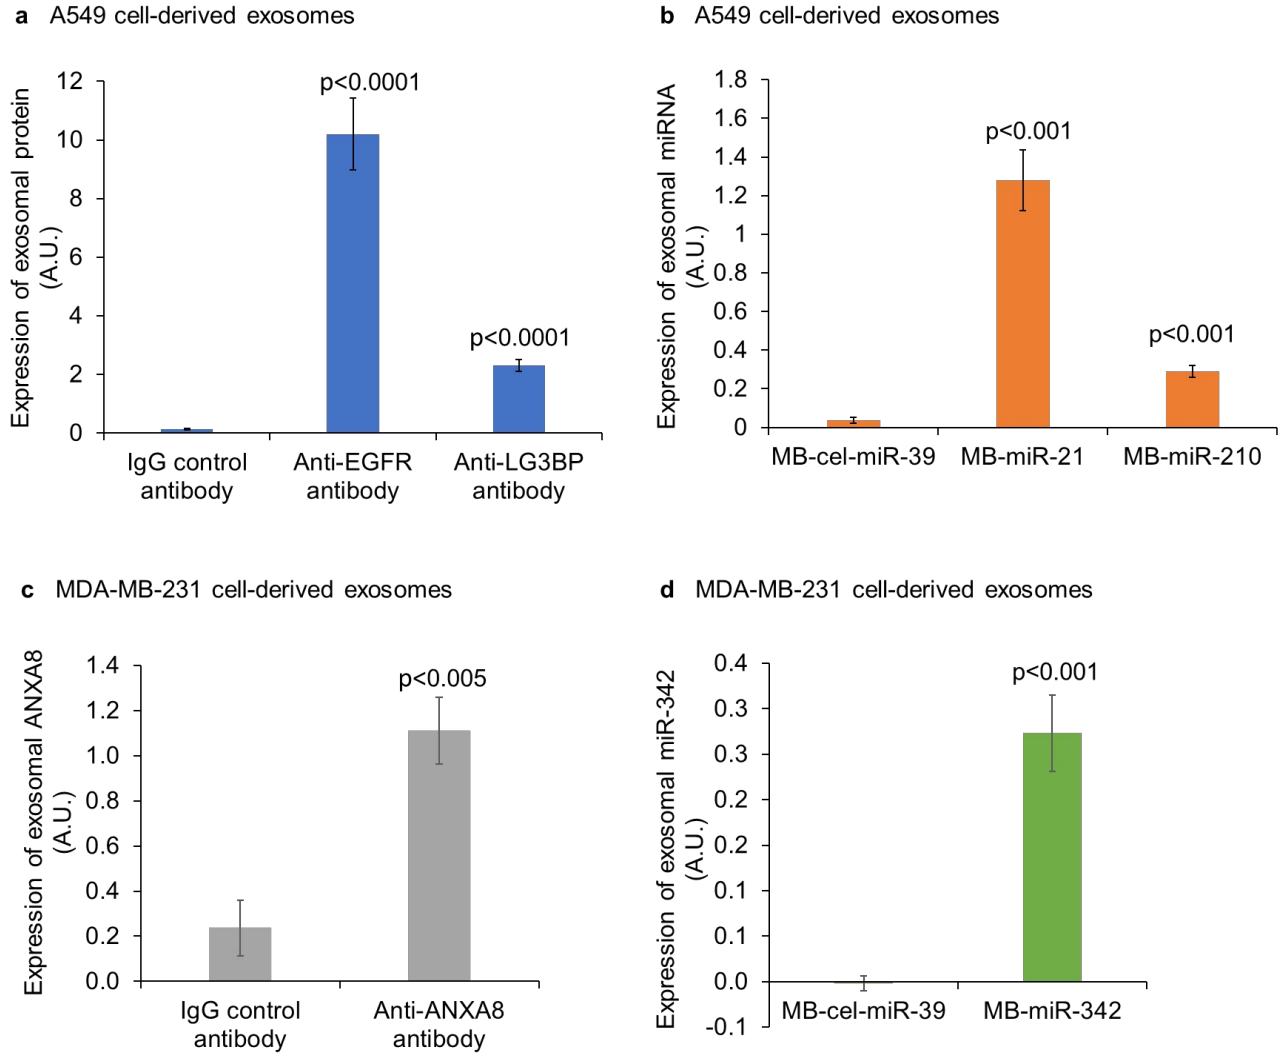

**Figure S6. Specificity of Exo-PROS assay.** (a, b) A549 cell derived exosomes were applied at the concentration of  $1.25 \times 10^{12}$  exosomes/mL. The expression of exosomal EGFR and LG3BP was measured when the surface of the biochip was modified with anti-EGFR, anti-LG3BP and anti-IgG control antibodies. The expression of EGFR+ exosomal miR-21 and LG3BP+ exosomal miR-210 was measured using miR-21 sensing MBs, miR-210 sensing MBs and cel-miR-39 control MBs. (c, d) MDA-MB-231 cell derived exosomes were applied at the concentration of  $10^{11}$  exosomes/mL. The expression of exosomal ANXA8 was measured when the surface of biochip was modified with anti-ANXA8 and anti-IgG control antibodies. The expression of ANXA8+ exosomal miR-342 was measured using miR-342 sensing MBs and cel-miR-39 control MBs. Little signals were observed from the anti-IgG control antibodies and cel-miR-39 control MBs, demonstrating that Exo-PROS assay has great specificity.

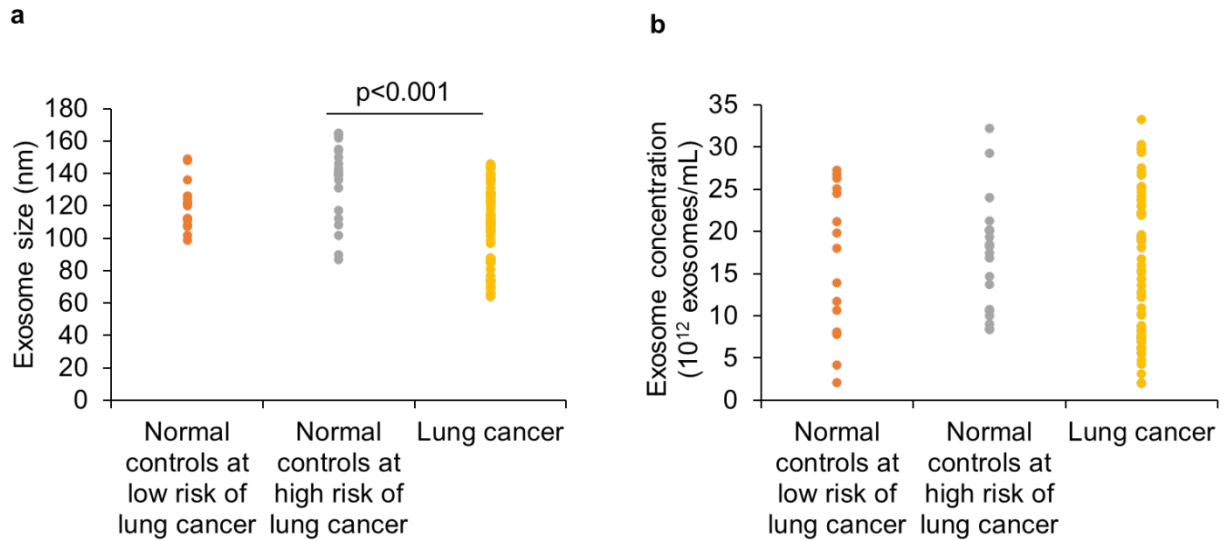

**Figure S7. Characterization of exosomes isolated from serum samples.** No significant difference was observed in the size and number concentration of serum-derived exosomes between normal controls at low risk of lung cancer (n=15) and lung cancer patients (n=60). Exosomes from normal controls at high risk of lung cancer (n=20) had larger size than those from lung cancer patients (n=60) (134 nm vs. 108 nm;  $p < 0.001$ ) but had similar number concentration as those from lung cancer patients. Exosomes were isolated from 50  $\mu$ L serum, resuspended in 50  $\mu$ L PBS and characterized by nanoparticle tracking analysis.

**a** Exo-PROS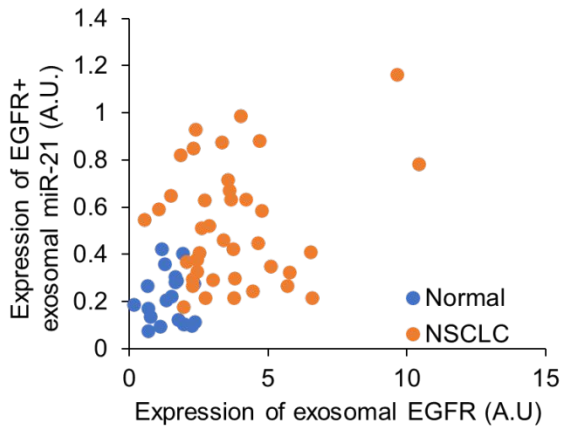**b** Exo-PROS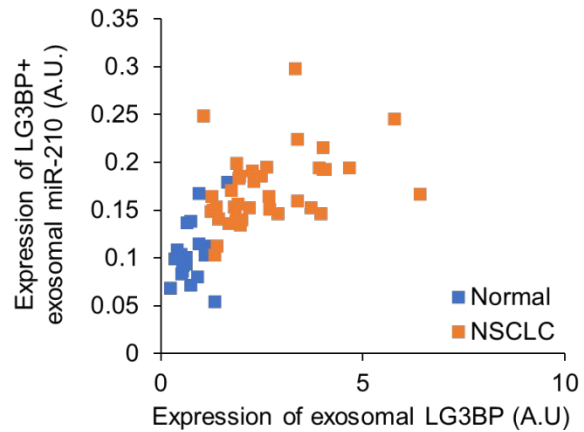**c** ELISA+IMS-PCR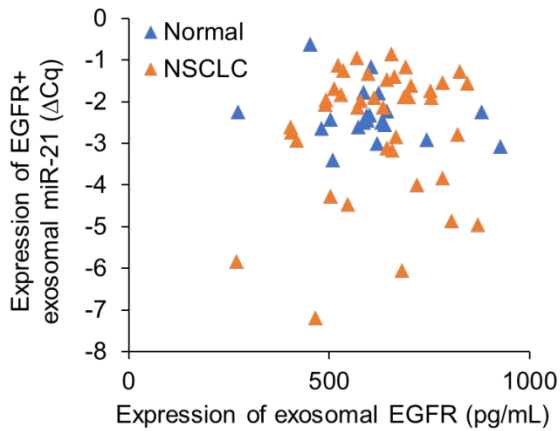**d** ELISA+IMS-PCR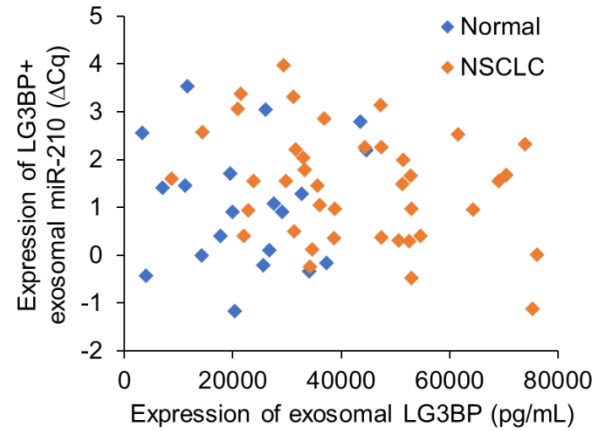**e** Exo-PROS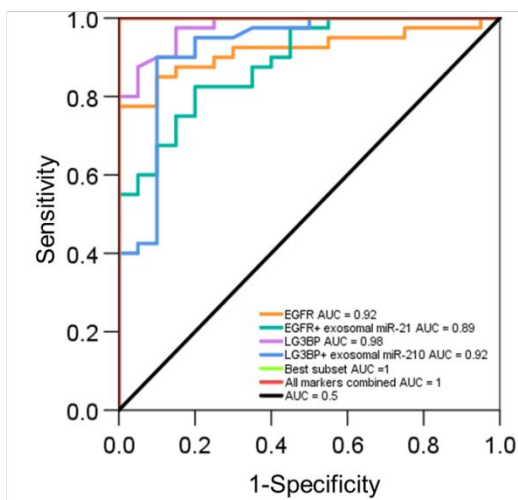**f** ELISA+IMS-PCR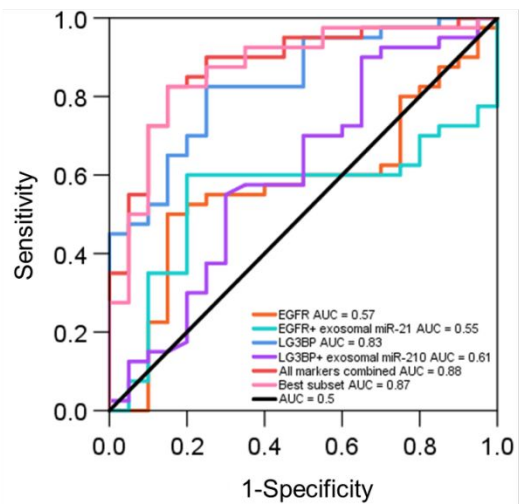**g**

| Assay           | EGFR alone |      |      | miR-21 alone |      |      | LG3BP alone |      |      | miR-210 alone |      |      | All markers combined |      |      |
|-----------------|------------|------|------|--------------|------|------|-------------|------|------|---------------|------|------|----------------------|------|------|
|                 | SEN        | SPE  | AUC  | SEN          | SPE  | AUC  | SEN         | SPE  | AUC  | SEN           | SPE  | AUC  | SEN                  | SPE  | AUC  |
| Normal vs NSCLC |            |      |      |              |      |      |             |      |      |               |      |      |                      |      |      |
| Exo-PROS        | 0.78       | 1.00 | 0.92 | 0.83         | 0.80 | 0.89 | 0.98        | 0.85 | 0.98 | 0.90          | 0.90 | 0.92 | 1.00                 | 1.00 | 1.00 |
| ELISA+IMS-PCR   | 0.50       | 0.85 | 0.57 | 0.60         | 0.80 | 0.55 | 0.83        | 0.75 | 0.83 | 0.55          | 0.70 | 0.61 | 0.83                 | 0.85 | 0.88 |

**Figure S8. Diagnostic performance comparison between Exo-PROS assay and IMS-PCR workflow.** Exosomes were isolated from 50  $\mu$ L sera from normal controls (n=20) and NSCLC patients (n=40). The normal controls included 15 normal controls at low risk of lung cancer (ID: 1-15 in Table S1) and 5 normal controls at high risk of lung cancer (ID: 16-20 in Table S1). NSCLC patients included 20 early stage NSCLC patients (stage I/II; ID: 36-55 in Table S1) and 20 late stage NSCLC patients (stage III/IV; ID: 66-85 in Table S1). The levels of TEX EGFR-miR-21 pair and LG3BP-miR-210 pair were measured by Exo-PROS assay (a, b), ELISA and IMS-PCR workflow (c, d). The Exo-PROS assay detected significantly higher levels of TEX EGFR-miR-21 pair and LG3BP-miR-210 pair in sera from NSCLC patients than normal controls ( $p < 0.0001$ ). For ELISA and IMS-PCR workflow, only exosomal LG3BP showed significantly higher levels in NSCLC patients than normal controls ( $p < 0.0001$ ). No significant difference in the expression of exosomal EGFR, miR-21 and miR-210 was seen between NSCLC patients and normal controls. (e, f, g) ROC analysis was performed to determine the sensitivity (SEN), specificity (SPE) and AUC of each biomarker, best subset of the biomarkers and all markers combined. For Exo-PROS assay, the best subset of the biomarkers was TEX EGFR-miR-21 pair and LG3BP+ exosomal miR-210, which achieved diagnostic sensitivity of 1, specificity of 1 and AUC of 1. For EGFR and IMS-PCR workflow, the best subset of biomarkers was TEX LG3BP-miR-210 pair and EGFR+ exosomal miR-21, which provided diagnostic sensitivity of 0.83, specificity of 0.85 and AUC of 0.87. For each biomarker or combined biomarkers, Exo-PROS assay showed better diagnostic performance in distinguishing NSCLC patients from normal controls than ELISA and IMS-PCR workflow.

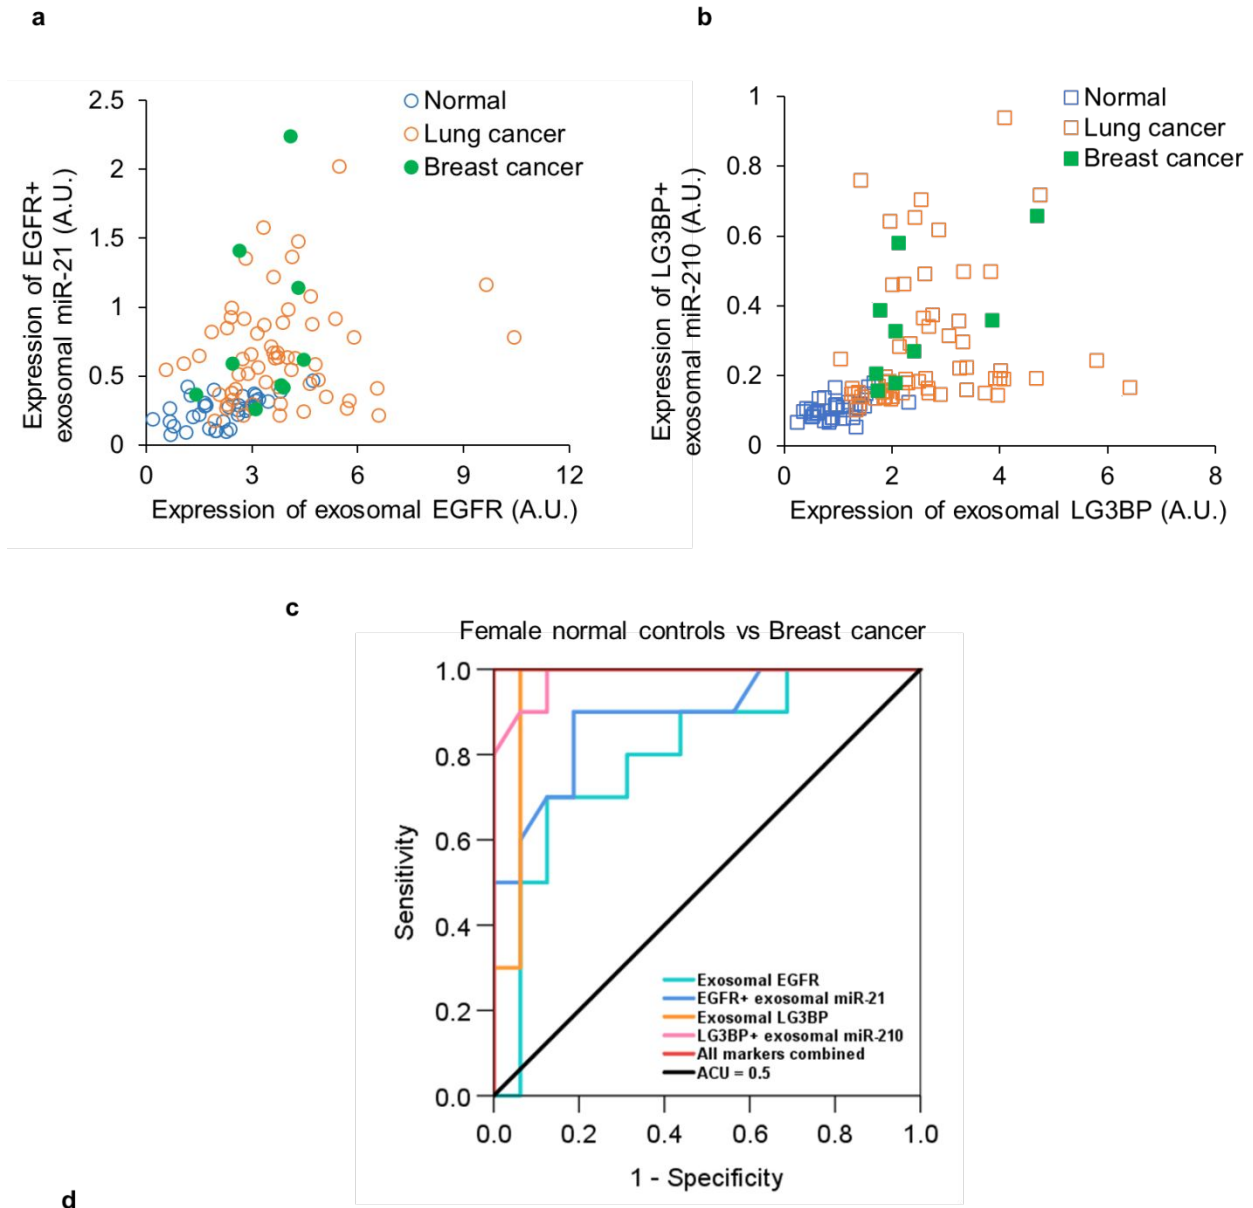

**Figure S9. Exo-PROS assay detected TEX EGFR-miR-21 and LG3BP-miR-210 pairs in sera from both lung cancer patients and breast cancer patients.** Exosomes were isolated from 50  $\mu$ L sera from normal controls (n=35 including 15 normal controls at low risk of lung cancer and 20 smokers at high risk of lung cancer), lung cancer patients (n=60, stage I-IV) and breast cancer patients (n=10, stage 0-IV). The levels of TEX EGFR-miR-21 and LG3BP-miR-

210 pairs were measured by Exo-PROS assay (a, b). The Exo-PROS assay detected significantly higher levels of TEX EGFR-miR-21 pair and LG3BP-miR-210 pair in sera from both lung cancer patients and breast cancer patients than normal controls ( $p < 0.05$ ). (c, d) ROC analysis was performed to determine the sensitivity (SEN), specificity (SPE) and AUC of each biomarker and all four markers combined in distinguish breast cancer patients ( $n=10$ ) from female normal controls ( $n=16$ ). Exo-PROS assay showed high diagnostic accuracy in distinguishing breast cancer patients from female normal controls.
